# Supplementary material
Source: Springer Nature journal article supplement (https://www.springermedizin.de/resource/supplementary/13053_2012_394_MOESM1_ESM.pdf/9673474)

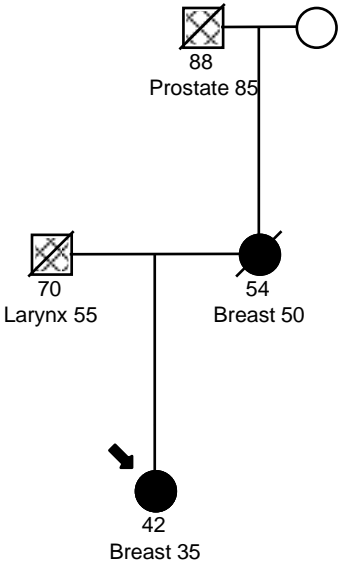

Supplement: MOESM1 [file 9673474]
